# Supplementary material for: Factors Associated With Initial Treatment Choice, Engagement, and Discontinuation for Patients With Opioid Use Disorder
Source: Atypon-hosted journal article supplement (doi:10.1176/appi.ps.202100239), 2021-10-20
Supplement: appi.ps.202100239.ds001.pdf [file appi.ps.202100239.ds001.pdf]

Online supplement for DOI 10.1176/appi.ps.202100239

Codes Used to Identify Psychosocial Treatment

| Category                         | Code Type        | Codes                                                                                                                                                                                                                                                                  |
|----------------------------------|------------------|------------------------------------------------------------------------------------------------------------------------------------------------------------------------------------------------------------------------------------------------------------------------|
| Rehab Treatment Center           | Revenue          | 0118, 0128, 0138, 0158, 1002                                                                                                                                                                                                                                           |
| Hospital inpatient therapy       | HCPCS            | H0017                                                                                                                                                                                                                                                                  |
| Hospital inpatient therapy       | ICD-9 Procedure  | 94.64, 94.66, 94.67, 94.69                                                                                                                                                                                                                                             |
| Hospital inpatient therapy       | ICD-10 Procedure | HZ3*, HZ4*, HZ5*, HZ6*                                                                                                                                                                                                                                                 |
| Non-hospital residential therapy | HCPCS            | H0018 - H0019                                                                                                                                                                                                                                                          |
| Partial hospitalization          | Revenue          | 0912 - 0913                                                                                                                                                                                                                                                            |
| Partial hospitalization          | HCPCS            | H0035                                                                                                                                                                                                                                                                  |
| Intensive outpatient             | HCPCS            | S9480                                                                                                                                                                                                                                                                  |
| Intensive outpatient             | Revenue          | 0905 - 0907                                                                                                                                                                                                                                                            |
| Intensive outpatient             | HCPCS            | H0015                                                                                                                                                                                                                                                                  |
| Outpatient                       | Revenue          | 0900, 0911, '0914 - 0916, 0919, 0944                                                                                                                                                                                                                                   |
| Outpatient                       | HCPCS            | H0001 - H0002, H0004 - H0006, H0016, H0020, H0022 - H0023, H0028, H0031 - H0032, H0036 - H0038, H0046 - H0047, H0050, H2000 - H2001, H2013, H2015 - H2022, H2027, H2032 - H2036, H5030, H5299, G0071 - G0082, G0176 - G0177, G0463, G0467, G0469 - G0470, M0064, S9454 |
| Outpatient                       | CPT              | 90791 - 90792, 90801 - 90802, 90804 - 90819, 90821 - 90823, 90826 - 90829, 90832 - 90840, 90842 - 90849, 90853, 90855, 90857, 90862, 90865, 90875 - 90876, 90880, 97003 - 97004, 99058, 99201-99205; 99211-99215; 99241-99245, 99412                                   |

### **Defining Gaps in Treatment for Opioid Use Disorder**

We defined gaps in pharmacotherapy as a 30+ day gap in day supply for prescription oral buprenorphine or naltrexone, 60+ day gap in medical claims for buprenorphine or naltrexone injections, and 30+ day gap in medical claims for methadone administration. For psychosocial treatment, a gap occurred when a subject did not have a subsequent medical claim for a psychosocial service within 30 days. Treatment end was set as the run out date of pharmacotherapy, the discharge date if the claim for pharmacotherapy occurred during an inpatient stay and run out occurred before the discharge date, or 29 days beyond the last claim for psychosocial treatment or beyond the discharge date of the last inpatient stay involving psychosocial treatment. The run out date for pharmacotherapy was based on day supply. Injections for buprenorphine and naltrexone were assumed to last 30 days, and methadone administrations were assumed to be in effect for the day of the claim. If a subject disenrolled from the health plan and had no gap in treatment before disenrollment, the disenrollment date marked the end of the initial treatment episode. Treatment episodes were capped at 18 months.

## Evaluation of the Proportional Hazards Assumption for Treatment Selection in the Cox Proportional Hazard Model for Opioid Use Disorder Treatment Discontinuation

The proportionality assumption was evaluated for treatment selection visually and tested by including an interaction of treatment selection and time in the Cox model. There was some evidence of nonproportionality, but its magnitude was modest. Many models had statistically significant interaction between the covariate of interest, hazard, and time; however, the  $\log(-\log(\text{survival}))$  plots were close to parallel, the Schoenfeld residuals plots were nearly flat, and the Pearson correlation coefficient between Schoenfeld residuals and  $\log(\text{time at risk})$  were nearly zero

The graph below demonstrates that the  $\log(-\log(\text{survival}))$  plots were close to parallel.

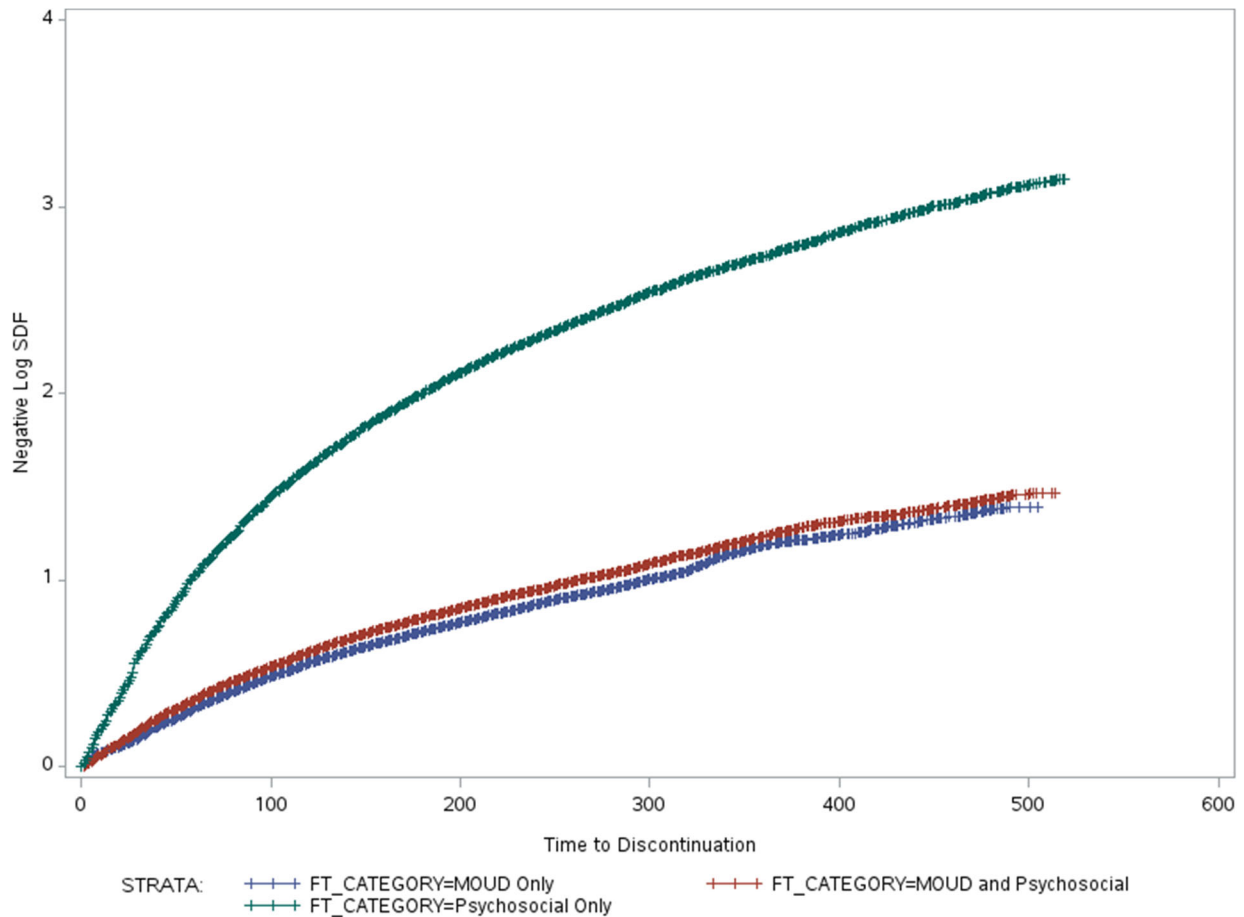

MOUD = medication for opioid use disorder

The graphs below show that the Schoenfeld residuals plots were nearly flat.

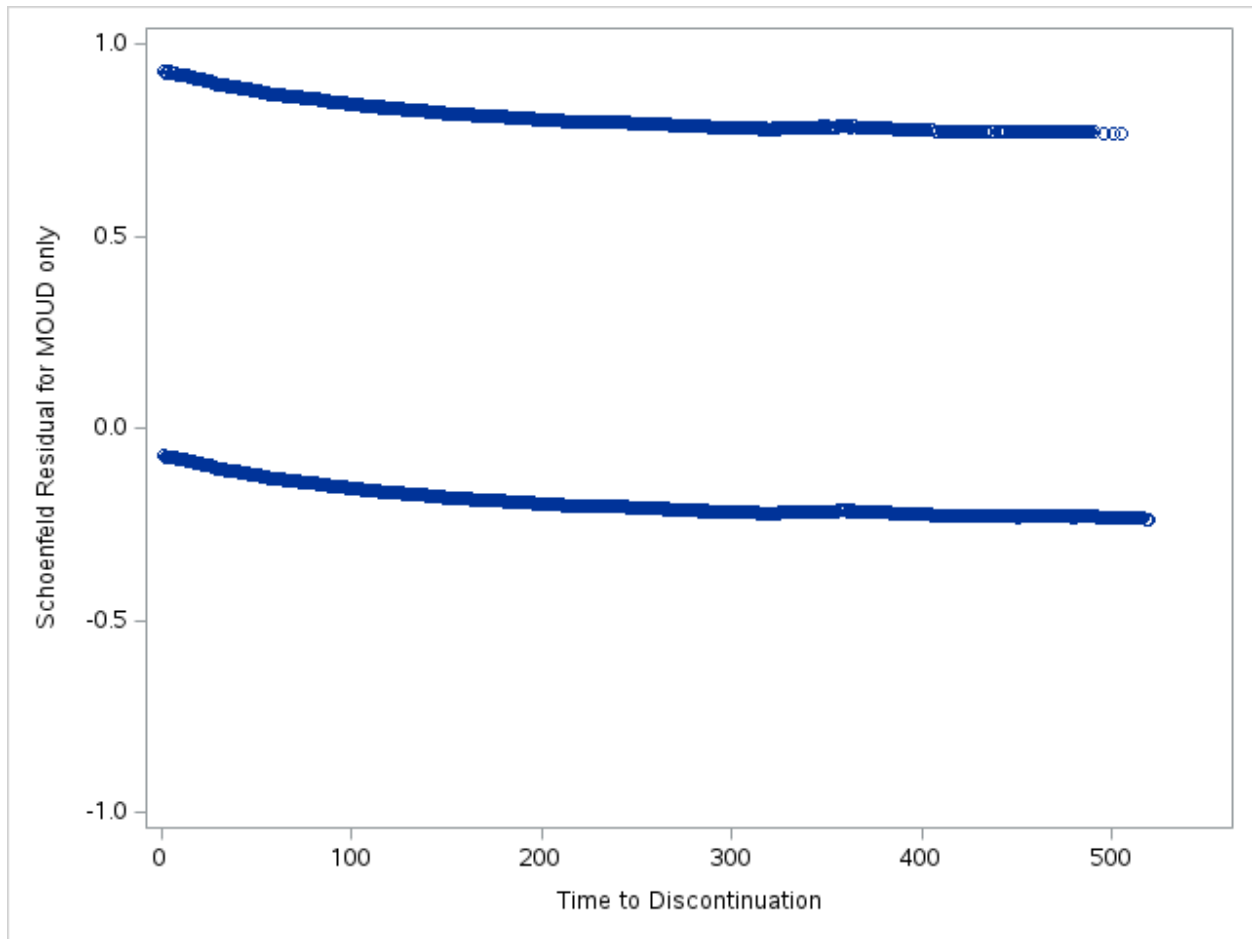

MOUD = medication for opioid use disorder

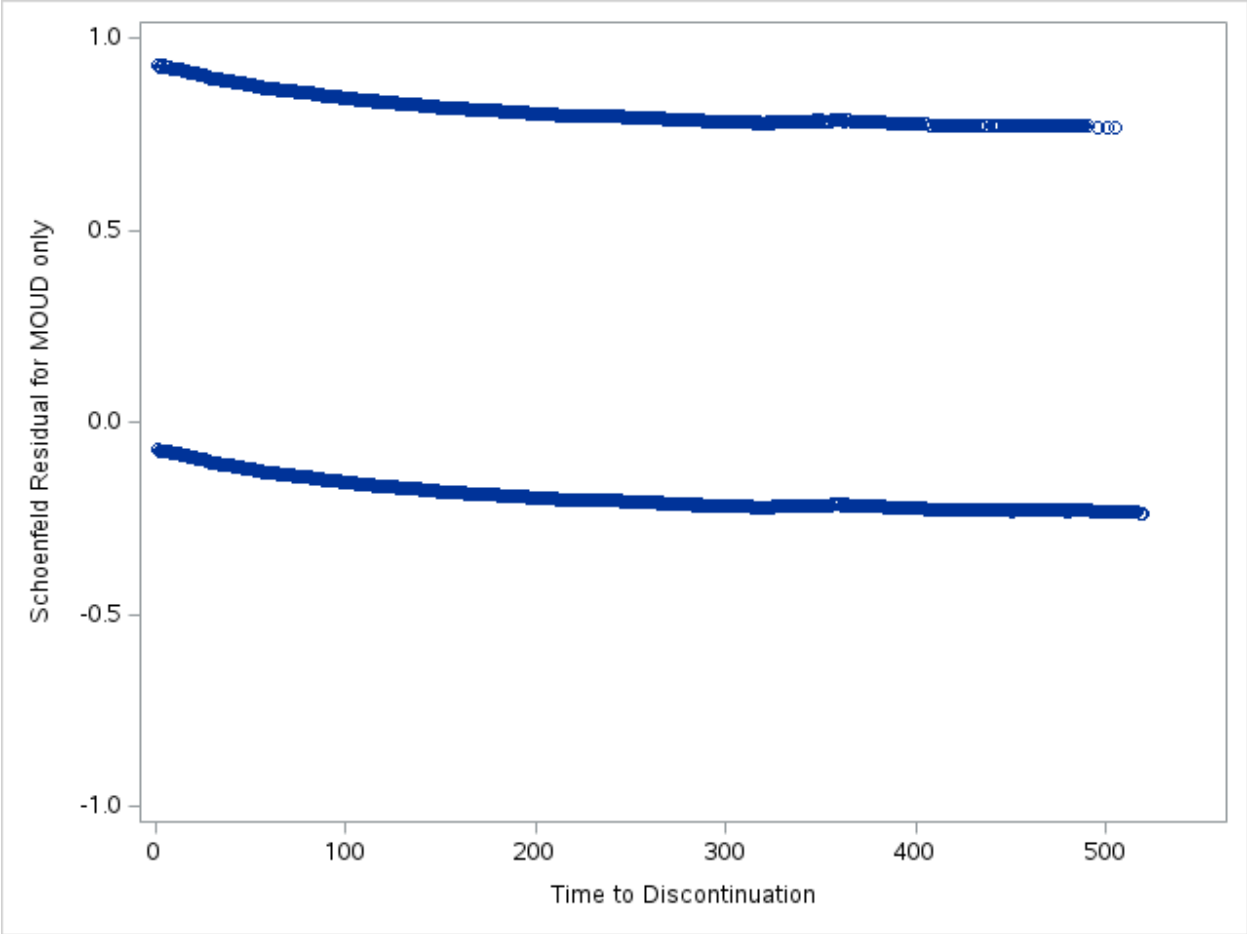

MOUD = medication for opioid use disorder

The table below demonstrates that the Pearson correlation coefficient between Schoenfeld residuals and log(time at risk) were nearly zero.

| <b>Pearson Correlation Coefficients</b><br><b>Prob &gt;  r  under H0: Rho=0</b><br><b>Number of Observations</b> |                |               |
|------------------------------------------------------------------------------------------------------------------|----------------|---------------|
|                                                                                                                  | <b>logtime</b> | <b>sqtime</b> |
| Schoenfeld Residual for MOUD Only                                                                                | 0.03561        | 0.05069       |
|                                                                                                                  | <.0001         | <.0001        |
|                                                                                                                  | 41003          | 41003         |
| Schoenfeld Residual for MOUD with Psychosocial Treatment                                                         | 0.04368        | 0.03998       |
|                                                                                                                  | <.0001         | <.0001        |
|                                                                                                                  | 41003          | 41003         |

MOUD = medication for opioid use disorder

### Codes Used to Identify Infections from Possible Injection Drug Use

| Infections                     | ICD-9 Codes                                                                                                                                                                                                                                                                            | ICD-10 Codes                                                                                                                                                                                                                                                             |
|--------------------------------|----------------------------------------------------------------------------------------------------------------------------------------------------------------------------------------------------------------------------------------------------------------------------------------|--------------------------------------------------------------------------------------------------------------------------------------------------------------------------------------------------------------------------------------------------------------------------|
| Bacteremia or Sepsis           | 0380, 03810, 03811, 03812, 03819, 0382, 0383, 03840, 03841, 03842, 03843, 03844, 03849, 0388, 0389, 41512, 42292, 449, 78552, 7907, 99590, 99591, 99592                                                                                                                                | A409, A412, A4101, A4102, A411, A403, A414, A4150, A413, A4151, A4152, A4153, A4159, A4189, A419, I2690, I400, I76, R6521, R7881, R6510, R6520                                                                                                                           |
| Endocarditis                   | 11281, 4210, 4211, 4219, 4240, 4241, 4242, 4243, 42490, 42491, 42499                                                                                                                                                                                                                   | B376, I330, I39, I339, I340, I348, I350, I358, I352, I351, I359, I360, I368, I370, I378, I38                                                                                                                                                                             |
| Osteomyelitis                  | 73000, 73001, 73002, 73003, 73004, 73005, 73006, 73007, 73008, 73009, 73010, 73011, 73012, 73013, 73014, 73015, 73016, 73017, 73018, 73019, 73020, 73021, 73022, 73023, 73024, 73025, 73026, 73027, 73028, 73029, 73090, 73091, 73092, 73093, 73094, 73095, 73096, 73097, 73098, 73099 | M8610, M8620, M86119, M86219, M86129, M86229, M86139, M86239, M86149, M86249, M86159, M86259, M86169, M86269, M86179, M86279, M8618, M8628, M8619, M8629, M8660, M86619, M86629, M86639, M86642, M86659, M86669, M86679, M8668, M8669, M869, M4620, M4630                |
| Skin or Soft Tissue Infections | 0400, 3240, 3241, 3249, 326, 56722, 56731, 56738, 5695, 5720, 59010, 59011, 68100, 68101, 68102, 68110, 68111, 6819, 6820, 6821, 6822, 6823, 6824, 6825, 6826, 6827, 6828, 6829, 7098, 7236, 72886, 72930, 72939, 7854                                                                 | A480, G060, G061, G062, G09, K651, K6812, K6819, K630, K750, N10, L03019, L03029, L03039, L03049, K122, L03211, L03212, L03213, L03221, L03222, L03319, L03329, L03119, L03129, L03317, L03811, L03818, L03891, L03898, L0390, L0391, L942, L988, M5402, M726, M793, I96 |

The source for the ICD-9 codes was

Tookes, H, Diaz C, Li H, et al: A cost analysis of hospitalizations for injections related to injection drug use at a county safety-net hospital in Miami, Florida. PLoS One 2015; 10: e0129360.

The General Equivalence Mappings (GEMs) was used to convert ICD-9 to ICD-10 codes.

**Treatment Initiation and Initial Treatment Type by Opioid Use Disorder Diagnosis**

|                              | <b>Statistic</b> | <b>Total<br/>N=204,225</b> | <b>Opioid<br/>Dependence<br/>N=137,706</b> | <b>Opioid Use<br/>N=16,629</b> | <b>Opioid<br/>Abuse<br/>N=17,945</b> | <b>Adverse<br/>Events<br/>N=15,119</b> | <b>Opioid<br/>Poisoning<br/>N=13,168</b> |
|------------------------------|------------------|----------------------------|--------------------------------------------|--------------------------------|--------------------------------------|----------------------------------------|------------------------------------------|
| Treatment Start with 30 Days | N                | 71,571                     | 48,000                                     | 2,953                          | 7,912                                | 1,308                                  | 3,589                                    |
|                              | %                | 35.05                      | 34.86                                      | 17.76                          | 44.09                                | 8.65                                   | 27.26                                    |
| Initial Treatment Type       |                  |                            |                                            |                                |                                      |                                        |                                          |
| Pharmacotherapy Only         | N                | 11,378                     | 2,316                                      | 36                             | 176                                  | 15                                     | 45                                       |
|                              | %                | 5.57                       | 1.68                                       | 0.22                           | 0.98                                 | 0.10                                   | 0.34                                     |
| Psychosocial Only            | N                | 50,178                     | 37,983                                     | 2,821                          | 6,978                                | 1,282                                  | 3,451                                    |
|                              | %                | 24.57                      | 27.58                                      | 16.96                          | 38.89                                | 8.48                                   | 26.21                                    |
| Both                         | N                | 10,015                     | 7,701                                      | 96                             | 758                                  | 11                                     | 93                                       |
|                              | %                | 4.90                       | 5.59                                       | 0.58                           | 4.22                                 | 0.07                                   | 0.71                                     |



### Kaplan-Meier Curves for Time to Treatment Discontinuation, by Initial Treatment Type

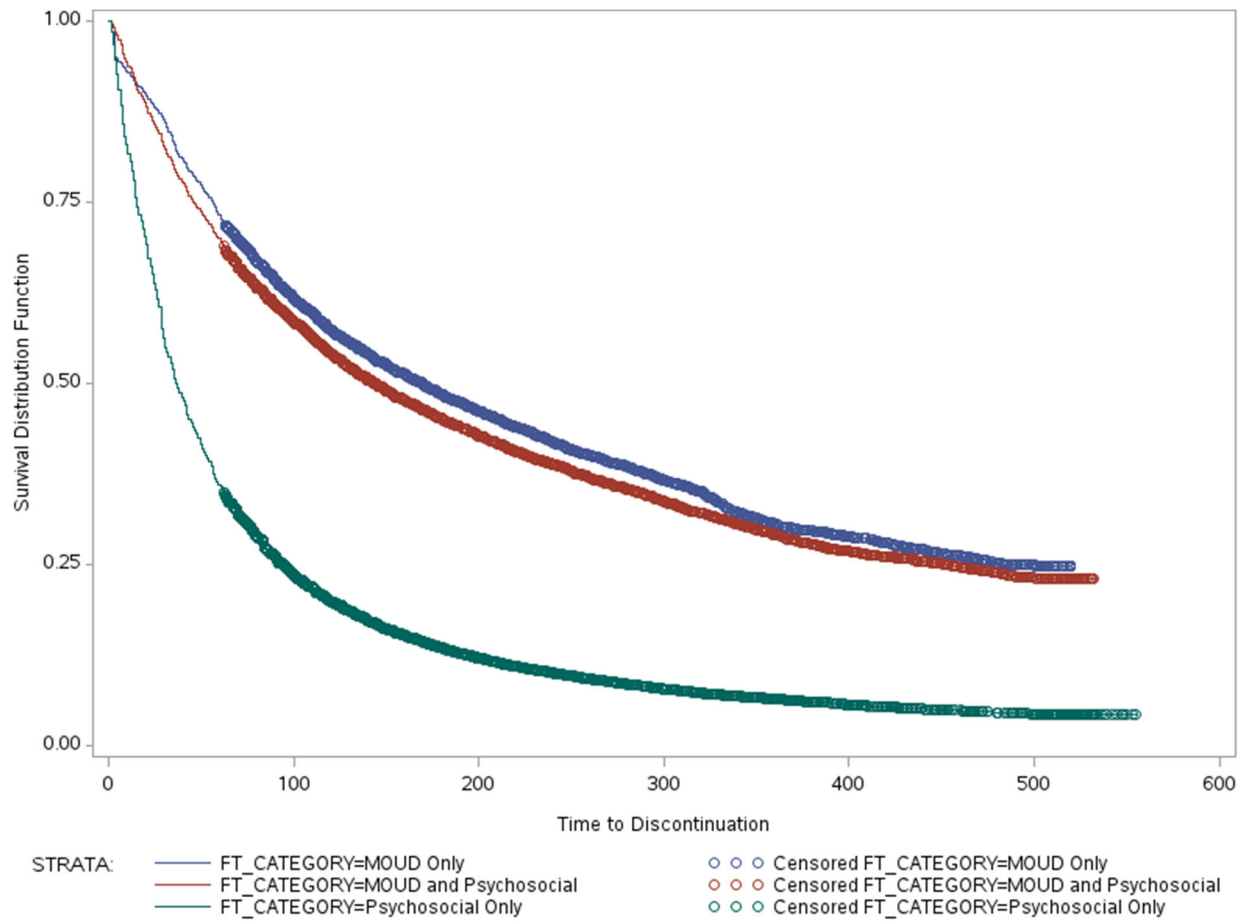

MOUD = medication for opioid use disorder
